# Supplementary material for: The Retinoblastoma Tumor Suppressor Transcriptionally Represses Pak1 in Osteoblasts
Source: PubMed Central journal article supplement (PMC4640669; doi:10.1371/journal.pone.0142406), 2015-11-10
Supplement: pone.0142406.s001.pdf [file pone.0142406.s001.pdf]

|        |                    |                   |                    |                   |                    |
|--------|--------------------|-------------------|--------------------|-------------------|--------------------|
| -1,052 | GCATAACTTG         | ATTCCAGTCA        | TGCGCCTCAA         | GGGCAAGGGA        | TGAGTTGGGT         |
| -1,002 | GAGTGTAGTG         | AGTGATGATG        | GGAGATACTG         | ACTTCTGGGT        | GTACAGGAAA         |
| -952   | TATGTGAAGG         | TACATTTTTT        | AACATTTTCAG        | TCTTAAGGAA        | GCACCGTTTA         |
| -902   | TTGGGATGGG         | GAAGACCAGA        | GTTGTTTCTT         | TAATGTGTCA        | TCCAGCTCCA         |
| -852   | AGTTCTATTG         | TAGTGACTGG        | TATCTGACAA         | GTGCTAAAGA        | AATTCTGAGA         |
| -802   | GTGGTGTAGG         | GCCTACTTCA        | TAACTCTGTG         | AAATAGACAT        | AGGTTTGTA          |
| -752   | AGTGTGGGGA         | CACATAGTAA        | ATAGCCCTTA         | ACAAATAGTA        | GCTGTTGCTG         |
| -702   | AACTTTCTCT         | GTTCAAAGGA        | GGTGGTTGGT         | ATAGGGACCA        | CCTTATTATC         |
| -652   | TTTCATGGGA         | CACATTTTAG        | AGAGTCAGCA         | GAAAAGAATA        | ATTTCCCCCT         |
| -602   | CTCCATTCTA         | GTCTGAATGA        | ATCTTGAATC         | TAATTTGAGT        | AGGTCTTGAT         |
| -552   | TCCGGGGTTC         | AAGAGGACTC        | CCACAGGCTC         | TAGAACAGCT        | GTTCTCAGCT         |
| -502   | TATAGGTCCA         | GATCCCTTGA        | GGGGTTGTTG         | AACTACCCTT        | TCACAGGGGT         |
| -452   | CACCTAAGAC         | CATTGGAAAT        | GTCAGATATT         | TACATTACAA        | TTCATAGCAG         |
| -402   | TAGCAAAATT         | ACAGAATTAC        | AAAATTATGA         | AATAGCAACA        | AAATTAATTT         |
| -352   | TATGATTGGG         | GGTCACCACA        | ATGTGAGGAA         | CTATATTAAA        | GAATCGCAGT         |
| -302   | GTTAGGAAGG         | TTGAGAACTA        | <b>CTGCTCTAAA</b>  | <b>AAGCCTGTCT</b> | <b>GGTACCTCTT</b>  |
| -252   | GTTGGAGCCT         | GGGTTGGGAG        | AACAGCAGAG         | ACAATCAGAA        | CATTGGTTAT         |
| -202   | GTA <b>TTTGTTT</b> | <b>CCCGCCCTC</b>  | AGCGCCTCTT         | CAGAAAAAAA        | GGGGCGGGGG         |
| -152   | CAGCGCTCTC         | CCCGCCTCCT        | TTCCCTCCTT         | TCTCTGTTCC        | TCC <b>CTCCCTC</b> |
| -102   | <b>CCCGCCCTT</b>   | CACTAAGCCT        | CTGTGT <b>CTTT</b> | <b>GCTGCCGCC</b>  | <b>TACGTGGGCC</b>  |
| -52    | <b>T</b> GAGTGTGCT | GCGCCTTGGG        | AGCTGGGTGG         | CTGCGCTGCG        | GCGCTTAGCC         |
| -2     | GAATCCAGCC         | TGTCAGGCTG        | GTTCAGCCCG         | GGCTTTGTCC        | CAACTGCTGA         |
| 48     | GCAGGGAGAG         | GTGCGGCTCT        | GCGACAGATA         | CACAAGATCA        | TCAGAGATGC         |
| 98     | TGGGCCCCGG         | ACCCACCGCC        | AGGTAATGCT         | GGCTTTCCCT        | GGGCCTGGCA         |
| 148    | TAGCTAGACT         | GAGAGCTGGG        | GTAGAAGGAG         | CGGGTGTCTT        | TCTGCCTTCC         |
| 198    | <b>GGGGAAGGGA</b>  | <b>ATGGGGAGAA</b> | <b>CATTACATTT</b>  | CACTTATATT        | AAGGGATTC          |
