# Supplementary material for: The Retinoblastoma Tumor Suppressor Transcriptionally Represses Pak1 in Osteoblasts
Source: PubMed Central journal article supplement (PMC4640669; doi:10.1371/journal.pone.0142406), 2015-11-10
Supplement: pone.0142406.s002.pdf [file pone.0142406.s002.pdf]

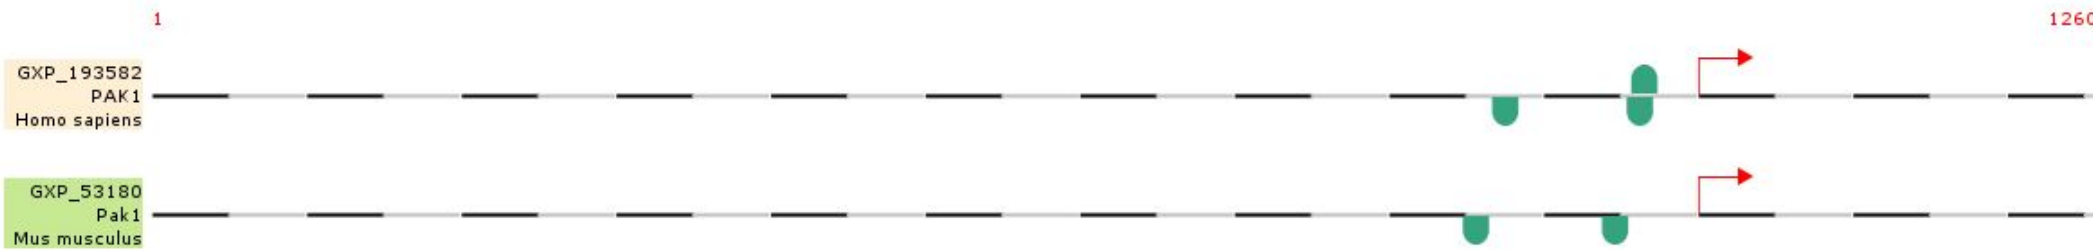

100 bp

|                                  |                                  |                                  |                                  |                                  |                                             |                                  |                                  |                                  |                                  |
|----------------------------------|----------------------------------|----------------------------------|----------------------------------|----------------------------------|---------------------------------------------|----------------------------------|----------------------------------|----------------------------------|----------------------------------|
| <input type="checkbox"/> V\$ABDB | <input type="checkbox"/> V\$AP1F | <input type="checkbox"/> V\$AP1R | <input type="checkbox"/> V\$AP4R | <input type="checkbox"/> V\$BARB | <input type="checkbox"/> V\$BCDF            | <input type="checkbox"/> V\$BRAC | <input type="checkbox"/> V\$BRN5 | <input type="checkbox"/> V\$BRNF | <input type="checkbox"/> V\$CART |
| <input type="checkbox"/> V\$CP2F | <input type="checkbox"/> V\$CREB | <input type="checkbox"/> V\$CTCF | <input type="checkbox"/> V\$DLXF | <input type="checkbox"/> V\$DMRT | <input checked="" type="checkbox"/> V\$E2FF | <input type="checkbox"/> V\$EBOX | <input type="checkbox"/> V\$EGRF | <input type="checkbox"/> V\$EREF | <input type="checkbox"/> V\$ETSF |
| <input type="checkbox"/> V\$EVI1 | <input type="checkbox"/> V\$FAST | <input type="checkbox"/> V\$FKHD | <input type="checkbox"/> V\$GLIF | <input type="checkbox"/> V\$GREF | <input type="checkbox"/> V\$GZF1            | <input type="checkbox"/> V\$HAML | <input type="checkbox"/> V\$HAND | <input type="checkbox"/> V\$HBOX | <input type="checkbox"/> V\$HEAT |
| <input type="checkbox"/> V\$HIFF | <input type="checkbox"/> V\$HNF1 | <input type="checkbox"/> V\$HOMF | <input type="checkbox"/> V\$HOXF | <input type="checkbox"/> V\$INSM | <input type="checkbox"/> V\$KLFS            | <input type="checkbox"/> V\$LEFF | <input type="checkbox"/> V\$LHXF | <input type="checkbox"/> V\$MAZF | <input type="checkbox"/> V\$MEF2 |
| <input type="checkbox"/> V\$MOKF | <input type="checkbox"/> V\$MYBL | <input type="checkbox"/> V\$MZF1 | <input type="checkbox"/> V\$NFKB | <input type="checkbox"/> V\$NKX6 | <input type="checkbox"/> V\$NKXH            | <input type="checkbox"/> V\$NR2F | <input type="checkbox"/> V\$NRSF | <input type="checkbox"/> V\$OCT1 | <input type="checkbox"/> V\$OVOL |
| <input type="checkbox"/> V\$PARF | <input type="checkbox"/> V\$PAX5 | <input type="checkbox"/> V\$PDX1 | <input type="checkbox"/> V\$PLAG | <input type="checkbox"/> V\$RREB | <input type="checkbox"/> V\$RUSH            | <input type="checkbox"/> V\$SNAP | <input type="checkbox"/> V\$SORY | <input type="checkbox"/> V\$SP1F | <input type="checkbox"/> V\$SPZ1 |
| <input type="checkbox"/> V\$SREB | <input type="checkbox"/> V\$SRFF | <input type="checkbox"/> V\$STAT | <input type="checkbox"/> V\$TALE | <input type="checkbox"/> V\$ZBPF |                                             |                                  |                                  |                                  |                                  |
